# Supplementary material for: Longitudinal Evaluation of the Effect of Tricyclic Antidepressants and Neuroleptics on the Course of Huntington’s Disease—Data from a Real World Cohort
Source: PubMed Central journal article supplement (PMC8064332; doi:10.3390/brainsci11040413), 2021-03-25
Supplement: brainsci-11-00413-s001.pdf [file brainsci-11-00413-s001.pdf]

# SUPPLEMENT

**Supplementary Table S1**

| Clomipramine                         | Clozapine                          | Chlorpromazine                | Doxepine                        | Desi-, Imi-, Trimipramine     |
|--------------------------------------|------------------------------------|-------------------------------|---------------------------------|-------------------------------|
| Anxiety (n=7)                        | Abnormal behavior (n=3)            | Abnormal behaviour (n=2)      | Antidepressant therapy (n=1)    | Depressed mood (n=1)          |
| Depression (n=32)                    | Affective disorder (n=2)           | Affective disorder (n=1)      | Anxiety (n=1)                   | Depression(n=12)              |
| Insomnia (n=3)                       | Aggression (n=1)                   | Eructation (n=1)              | Depression (n=25)               | Duodenal ulcer (n=1)          |
| Irritability (n=4)                   | Agitation (n=2)                    | Insomnia (n=1)                | Fibromyalgia (n=1)              | Enuresis (n=1)                |
| Obsessive thoughts (n=2)             | Chorea (n=1)                       | Irritability (n=2)            | Insomnia (n=8)                  | Insomnia (n=5)                |
| Obsessive-compulsive disorder (n=11) | Delusion (n=6)                     | Mild mental retardation (n=1) | Psychogenic pain disorder (n=1) | Mental disorder (n=1)         |
| Perseveration (n=1)                  | Delusion mixed (n=1)               | Mood swings (n=1)             | Sleep disorder (n=3)            | Salivary hypersecretion (n=1) |
| Schizoaffective disorder (n=1)       | Dyskinesia (n=1)                   | Psychotic disorder (n=8)      |                                 | Sleep disorder (n=2)          |
|                                      | Dystonia (n=1)                     |                               |                                 |                               |
|                                      | Hallucination (n=2)                |                               |                                 |                               |
|                                      | Insomnia (n=1)                     |                               |                                 |                               |
|                                      | Irritability (n=2)                 |                               |                                 |                               |
|                                      | Obsessive thoughts (n=2)           |                               |                                 |                               |
|                                      | Paranoia (n=1)                     |                               |                                 |                               |
|                                      | Perseveration (n=1)                |                               |                                 |                               |
|                                      | Psychotic disorder (n=34)          |                               |                                 |                               |
|                                      | Restlessness (n=1)                 |                               |                                 |                               |
|                                      | Schizoaffective disorder (n=1)     |                               |                                 |                               |
|                                      | Schizophrenia (n=4)                |                               |                                 |                               |
|                                      | Schizophrenia, paranoid type (n=3) |                               |                                 |                               |
|                                      | Screaming (n=1)                    |                               |                                 |                               |

**Supplementary Table S1:** Treatment indications. Indication for analyzed medications separated depending on respective groups during baseline visit (double entries implemented).

*Abbreviation: n: number.*
